1 **Monocyte reconstitution and gut microbiota composition after hematopoietic stem cell**  
2 **transplantation**

3 Sejal Morjaria<sup>1,7</sup>, Allen W. Zhang<sup>2</sup>, Sohn Kim<sup>3</sup>, Jonathan U. Peled<sup>6,7</sup>, Simone Becattini<sup>3</sup>, Eric R. Littmann<sup>5</sup>,  
4 Eric. G. Pamer <sup>1,2,3,5,7</sup>, Miguel-Angel Perales<sup>6,7</sup>, Michael C. Abt<sup>4</sup>,

5 **Author Affiliations:**

6 <sup>1</sup>Infectious Disease, Department of Medicine, Memorial Sloan Kettering Cancer Center, New  
7 York, NY

8 <sup>2</sup>Department of Epidemiology and Biostatistics, Memorial Sloan Kettering Cancer Center, New York, NY

9 <sup>3</sup>Immunology Program and Infectious Disease Service, Memorial Sloan-Kettering Cancer Center, New  
10 York, NY

11 <sup>4</sup>Department of Microbiology, Perelman School of Medicine, University of Pennsylvania, Philadelphia,  
12 PA 19104, USA

13 <sup>5</sup>Lucielle Castori Center for Microbes, Inflammation and Cancer, Sloan Kettering Institute, New  
14 York, NY

15 <sup>6</sup>Adult Bone Marrow Transplantation Service, Department of Medicine, Memorial Sloan Kettering Cancer  
16 Center, New York, NY

17 <sup>7</sup>Weill Cornell Medical College, New York, NY

18 **Co- Corresponding Author Contact Information:**

19  
20 Sejal Morjaria, [morjaris@mskcc.org](mailto:morjaris@mskcc.org)  
21 1275 York Avenue,  
22 New York, New York 10065  
23 T: 212-639-2359

24  
25 Michael Abt, [michael.abt@penmedicine.upenn.edu](mailto:michael.abt@penmedicine.upenn.edu)  
26 303B Johnson Pavilion, 3610 Hamilton Walk  
27 Philadelphia, PA 19103  
28 T: 215-898-0596

29

30

31 **Background:**

32 Monocytes are an essential cellular component of the innate immune system that support the  
33 host's effectiveness to combat a range of infectious pathogens. Hemopoietic cell transplantation (HCT)  
34 results in transient monocyte depletion, but the factors that regulate recovery of monocyte populations  
35 are not fully understood. In this study, we investigated whether the composition of the gastrointestinal  
36 microbiota is associated with the recovery of monocyte homeostasis after HCT.

37

38 **Methods:**

39 We performed a single-center, prospective, pilot study of 18 recipients of either autologous or  
40 allogeneic HCT. Serial blood and stool samples were collected from each patient during their HCT  
41 hospitalization. Analysis of the gut microbiota was done using 16S rRNA gene sequencing and flow  
42 cytometric analysis was used to characterize the phenotypic composition of monocyte populations.

43

44 **Results:**

45 Dynamic fluctuations in monocyte reconstitution occurred after HCT and large differences were  
46 observed in monocyte frequency among patients over time. Recovery of absolute monocyte counts and  
47 monocyte subsets showed significant variability across the heterogeneous transplant types and  
48 conditioning intensities; no relationship to the microbiota composition was observed in this small  
49 cohort.

50

51 **Conclusion:**

52 A relationship between the microbiota composition and monocyte homeostasis could not be  
53 firmly established in this pilot study.

54

55 **Keywords: microbiota; hematopoietic cell transplantation; monocytes; systems biology; immune**

56 **reconstitution**

57

58

59

60

61

62

63

64

65

66

67

68

69

70

71

72

73

74

75

76

77

78 **BACKGROUND**

79

80 Hematopoietic cell transplantation (HCT) is a potentially curative procedure for patients with  
81 hematologic malignancies but its success has been limited by the morbidity and mortality of post-  
82 transplant infections and relapse. Impaired immune reconstitution post-HCT increases the risk of both of  
83 these complications [1-4]. Multiple factors influence the vulnerability of patients to these complications  
84 including: time since transplantation, graft source (i.e., autologous (auto-HCT) or allogeneic (allo-HCT)),  
85 and persisting myelosuppression (humoral and cell-mediated) post-HCT [2, 3]. Alterations in the  
86 microbiome have been associated with clinical outcomes of patients who have undergone HCT,  
87 including their survival. However, the mechanisms by which the gut microbiota exerts its effects, both  
88 beneficial and detrimental, have not been fully elucidated [5, 6].

89 In humans there are three main circulating monocyte subsets with diverse functions, classified  
90 based on their expression of CD14 and CD16 surface proteins and cytokine production. These monocyte  
91 subsets are named “classical”, “intermediate”, and “non-classical monocytes” [7-9] and typically  
92 comprise 85%, 10%, and 5% respectively of the circulating monocyte pool in a healthy individual under  
93 homeostatic conditions [10, 11]. Classical monocytes specialize in phagocytosis and produce the  
94 cytokine IL-10 [12], while intermediate monocytes have elevated surface expression of MHC class II,  
95 suggesting they have an important role in antigen presentation [13]. In contrast, non-classical  
96 monocytes secrete substantial levels of inflammatory cytokines (TNF and interleukin [IL]-1 $\beta$ ) and are  
97 known to exert endothelial surveillance by endovascular slow patrolling when tissue damage is present  
98 [14]. These roles make monocytes a critical cell line for host defense against common post-HCT  
99 infections including *Aspergillus*, and for mitigating the risk of developing GVHD [15-22].

100 While it has been shown that monocyte reconstitution in the first 100 days post-HCT is  
101 associated with improved survival [23, 24], a better understanding of the mechanisms that regulate

102 monocyte reconstitution in this setting is needed. Given the known immunomodulating properties of  
103 the microbiota [25-29], we investigated whether the composition of the intestinal microbiota is  
104 associated with monocyte recovery. Monocyte migration out of the bone marrow and into the blood  
105 circulation is driven by low level lipopolysaccharide (LPS)-mediated signaling [30]. Further, basal  
106 circulating LPS levels derived from the intestinal microbiota have been detected in  
107 immunocompromised hosts [31, 32]. Therefore, we hypothesized that microbial communities of gram-  
108 negative bacteria through the production of LPS [33, 34] and commensal obligate anaerobes [35]  
109 influence monocyte maturation post-HCT.

110

## 111 **METHODS**

112

### 113 **Study Patients, Specimen Collection, and Patient Tracking**

114 We followed 18 adult recipients of auto- or allo-HCT at Memorial Sloan Kettering Cancer Center  
115 (MSKCC) from July 2015 to January 2016. There were 7 female and 11 male patients; their ages ranged  
116 from 40 to 75. Fecal samples were collected longitudinally from each patient during their transplant  
117 hospitalization using a prospective institutional fecal biospecimen collection protocol (described  
118 previously) [36]. For the majority of patients, daily collection began at the start of pre-transplant  
119 conditioning (7-10 days before hematopoietic cell infusion) and continued until discharge. The median  
120 average length of stay for patients in this cohort was 27 days. Clinical metadata for all patients, including  
121 medication administrations (i.e. chemotherapy agents, antibiotics, etc.), absolute white blood cell values  
122 (obtained from routine daily complete blood counts), and other patient characteristics, were retrieved  
123 from the electronic health record. The study protocol was approved by the institutional review board.  
124 Informed consent was obtained from all subjects prior to specimen collection.

125

## 126 **Transplantation Practices**

127           Antimicrobial prophylaxis was given routinely to patients undergoing HCT. Subjects undergoing  
128 either auto- or allo-HCT were given ciprofloxacin two days prior to hematopoietic cell infusion as  
129 prophylaxis against gram-negative bacterial infections. Allo-HCT recipients were given intravenous (IV)  
130 vancomycin for prophylaxis against viridans-group streptococci [28]. Antibiotic prophylaxis against  
131 *Pneumocystis jiroveci* pneumonia was generally administered using either trimethoprim-  
132 sulfamethoxazole, aerosolized pentamidine, or atovaquone; the time at which prophylaxis was initiated  
133 (during conditioning or after engraftment, defined as an absolute neutrophil count  $\geq$  500  
134 neutrophils/mm<sup>3</sup> for three consecutive days) varied. In the event of a new fever during times of  
135 neutropenia, patients were usually started on empiric antibiotics, such as piperacillin-tazobactam,  
136 cefepime, or meropenem. Recipients of an autograft received pegfilgrastim on day +1 and recipients of  
137 an allograft received daily filgrastim starting on day+7 until engraftment to accelerate recovery from  
138 neutropenia [37].

139

## 140 **Sample Analysis and Defining Microbial Predictors**

### 141 *Sample Analysis-*

142           Stool DNA was extracted and purified, and the V4-V5 region of the 16S rRNA gene was amplified  
143 by polymerase chain reaction using modified universal bacterial primers [38]. Sequencing was  
144 performed using the Illumina Miseq platform[39] to obtain paired-end reads. These reads were  
145 assembled, processed, filtered for quality, and grouped into operational taxonomic units of 97%  
146 similarity using a previously described UPARSE pipeline [25]. Taxonomic assignment to species level was  
147 performed using nucleotide BLAST (Basic Local Alignment Search Too) [40] with the National Center for  
148 Biotechnology Information RefSeq (refseq\_rna) as the reference database [41]. Alpha diversity was  
149 calculated using the inverse Simpson index at the OTU level [42].

150

151 *Microbial Predictors-*

152 We analyzed obligate anaerobic bacteria by major anaerobic groups defined at various  
153 taxonomic levels for their importance in maintaining 'healthy' immunity [35, 43-46]: *Clostridia* (class),  
154 *Bacteroidetes* (phylum), *Negativicutes* (class) and *Fusobacteria* (genus). Percent anaerobes in a given  
155 stool sample was calculated by adding the percent 16S rRNA gene sequences of these obligate  
156 anaerobic bacteria.

### 157 **Monocyte subsets, analysis of blood samples, monocyte isolation and flow cytometry**

158 A median of 7 blood samples were obtained from each patient during transplant days -10 to  
159 +30. 5-10 cc of blood in heparinized tubes were processed within four hours of collection. The first  
160 blood sample was collected within two days of hospital admission (prior to any perturbations to white  
161 blood cells from chemotherapy or radiation) and subsequent blood samples were collected at the start  
162 of white blood cell reconstitution through engraftment [47, 48].

163 Peripheral blood mononuclear cells were isolated by density gradient centrifugation  
164 (Histopaque 1119; Sigma). Single-cell suspensions were stained for surface antigens with fluorescently  
165 conjugated antibodies and samples were acquired with LSR II (Becton Dickinson). All flow cytometry  
166 data were analyzed using FlowJo software. For flow cytometry staining, the following antibodies were  
167 used: CD14-PE (clone M5E2; BD Biosciences) , CD16-FITC (clone 3G8;BD Biosciences), CCR2-APC (clone  
168 K036C2; BioLegend), CD45-Alexa Fluor 700 (clone HI30; BioLegend), CD11b (APC-Cy7; clone ICRF44;  
169 BioLegend), HLA-DR-PE-Texas Red (clone L243; BioLegend), CD86-PE-Cy7 (clone IT2.2; BioLegend), CD15-  
170 Pacific Blue (clone HI98; eBioscience), CD20-PerCP-Cy5.5 (clone 2H7; BioLegend), CD3- PerCP-Cy5.5  
171 (clone OKT3; BioLegend), CD19- PerCP-Cy5.5 (clone SJ25C1; BioLegend), CD56- PerCP-Cy5.5 (clone  
172 5.1H11; BioLegend), and CD5- PerCP-Cy5.5 (clone UCHT2; BioLegend). Fluorescent minus one controls  
173 (FMO) were used to determine positive staining gate [49]. The monocyte gating strategy employed to

174 define monocyte subsets (classical, intermediate, and non-classical) [10, 11, 50] is shown with CD14 on  
175 the x-axis and CD16 on the y-axis. A dump gate excluded B cells, T cells, and NK cells using CD19/CD20,  
176 CD3, and CD56, respectively (**Supplementary Figure 2**).

177

#### 178 **Analytical Approach:**

179 We analyzed absolute monocyte count recovery as a function of time at the start of immune  
180 reconstitution defined as: engraftment day minus 2 days (“reconstitution day”) until hospital discharge,  
181 using conditioning intensity and transplant type as stratification variables. Linear mixed models were fit  
182 using patient as a random effect (for intercept), absolute monocyte count as the dependent variable,  
183 and reconstitution day as a fixed effect. Fixed effect sizes and 95% confidence intervals are shown.

184 Descriptive statistics (box plots) were used to visualize the proportions of classical  
185 (CD14<sup>hi</sup>CD16<sup>neg</sup>), intermediate (CD14<sup>hi</sup>CD16<sup>int</sup>), and non-classical (CD14<sup>int</sup>CD16<sup>hi</sup>) monocytes in the last  
186 blood sample collected from each patient, to assess whether the subpopulations of circulating  
187 monocytes reached their estimated targets: ~85% classical monocytes; ~10% non-classical monocytes;  
188 ~5% intermediate monocytes. These thresholds were determined based on previous studies [10, 11, 51].

189 We calculated the Pearson correlation coefficient to measure the strength of the relationship  
190 between the proportion of anaerobic commensal gut microbes and microbial diversity to monocyte  
191 subset recovery. Next, we trained linear regression models while controlling for false discovery rates  
192 [52] to assess whether or not different clinical predictors correlated with monocyte recovery in the last  
193 blood sample tested (using the above mentioned ‘target’ values). The following clinical variables were  
194 used in the regression: 1. conditioning type (RIC versus MAC) 2. transplant type (T-cell depleted versus  
195 unmodified versus auto-HCT) 3. GCSF administration within 7 days of blood collection 4. A bloodstream  
196 infection (excluding positive blood cultures considered to be a “contaminant”) within 7 days of blood  
197 collection and 5. percent gram-negative bacteria (in the phyla, *Bacteroidetes* and *Proteobacteria*, major



198 gram-negative taxa) in the stool sample collected within 3 days of the last blood sample collected.

199 Statistical analyses were performed using R (v. 3.3.1).

200

## 201 **RESULTS**

202

### 203 **Description of study population and biospecimens**

204 Our cohort consisted of 18 patients who underwent auto- or allo-HCT at MSKCC between July  
205 2015 to January 2016. Patients underwent different types of HCT for different hematologic  
206 malignancies. Four patients received an auto-HCT after myeloablative conditioning (MAC) with  
207 Carmustine (BCNU), etoposide, cytarabine, and melphalan (BEAM). Four patients received an allo-HCT  
208 after MAC conditioning consisted of the following regimens: total body irradiation (TBI), thiotepa, and  
209 cyclophosphamide or busulfan, melphalan, and fludarabine. Ten patients were recipients of an allo-HCT  
210 after reduced intensity conditioning (RIC) regimens. Clinical characteristics for each patient are shown in  
211 Table 1.

212 The duration of transplant hospitalization ranged from 20 to 38 days, during which antibiotics  
213 were given for both prophylactic and treatment purposes. Throughout this period, we sought to collect  
214 fecal samples on a daily basis. Out of the total 352 hospital days for these 18 patients, 318 stool samples  
215 were collected (90% of total hospital days). Of those samples, 236 (74%) yielded 16S amplicons that  
216 could be sequenced. Each blood sample was paired with a stool sample collected within 3 days. A  
217 median of 15 stool samples and 7 blood samples were collected per patient during their HCT  
218 hospitalization (**Table 1**).

219

220

221

## 222 **Monocyte Recovery**

223 Monocyte counts were considered during an analysis window from two days prior to the date of  
224 neutrophil engraftment (“reconstitution day”) until hospital discharge. Significant differences in  
225 reconstitution trajectories were found among groups stratified by conditioning regimens and transplant  
226 type. Patients receiving reduced intensity conditioning and unmodified transplants demonstrated the  
227 most variability ( $CI_{95\%} = [0.196 \pm 0.062]$  and  $CI_{95\%} = [0.194 \pm 0.060]$ , respectively). All 18 patients reached a  
228 minimum normal absolute monocyte count value of  $0.26 \times 10^9/L$  defined elsewhere, [53-55] and  
229 patients who received RIC and an unmodified transplant were more likely to overshoot the upper  
230 reference limit of  $1.3 \times 10^9$  (a value determined by the MSKCC laboratory) (**Figure 1A, Figure 1B**).

231 Three representative flow cytometry plots collected longitudinally from 3 patients who received  
232 different transplant types (Auto-HCT; Allo-HCT (RIC); Allo-HCT (MAC) show significant monocyte  
233 heterogeneity. That is, the commonly observed distribution of monocytes (‘banana shape’) within a  
234 patient [56, 57] changes over time (**Figure 2A**). All other patients ( $n = 15$ ) are shown in **Supplementary**  
235 **Figure 1**. The gating strategy used to identify the monocyte subsets of interest is shown in  
236 **Supplementary Figure 2**.

237 Some patterns in monocyte reconstitution were present; classical monocytes had an initial  
238 robust recovery consistent with previous findings [58], followed by restoration of intermediate and non-  
239 classical monocytes at later timepoints (**Figure 2A**). This observation was especially true with respect to  
240 the recovery of non-classical monocytes. On average, patients who were recipients of either an auto-  
241 HCT or allo-HCT with RIC were more likely than allo-HCT patients with MAC to recover classical  
242 monocytes to target threshold (~85%). The threshold of ~5% intermediate monocytes was met in 72%  
243 (13/18) of patients, while those that received an allo-HCT with MAC conditioning were more likely to be  
244 discharged with levels of circulating non-classical monocytes that met target (~10%) (**Figure 2B**).

245           We next compared the frequency of circulating monocytes subsets with the composition of the  
246 intestinal microbiota. Diversity of intestinal microbial communities, as measured by inverse Simpson  
247 index, were not associated with monocyte recovery (**Figure 3A**). Additionally, the proportion of obligate  
248 anaerobes associated with a healthy flora (*Negativacutes*, *Clostridia*, *Bacteroidiales*, and *Fusobacteria*)  
249 within the microbiota did not correlate with monocyte recovery (**Figure 3B**).

250           While the proportion of monocyte subset recovery did not correlate with the microbiota, we  
251 next sought to investigate whether immune activation status of monocytes subsets was altered by the  
252 microbiota composition. Monocyte immune activation phenotype as measured by the expression of cell  
253 surface markers (CD86, HLA-DR, and CCR-2 (**Supplementary Table 1**)). was assessed in each three  
254 subsets of monocytes. No correlation was observed between expression of these markers and  
255 microbiota diversity (**Supplementary Figure 3**) or percent of obligate anaerobic bacteria in the  
256 microbiota (**Supplementary Figure 4**).

257           We used a simple linear regression model to test whether different compositional  
258 characteristics of the microbiota and different clinical variables are related to monocyte recovery. In a  
259 linear regression model, microbiota diversity and the proportion of gram-negative Proteobacteria? in  
260 the gut were not observed to be associated with monocyte recovery of each subset. Exposure to GCSF  
261 within 7 days of blood sample collection/processing was associated with successful reconstitution of  
262 classical and intermediate monocytes ( $p = 0.037$  and  $p = 0.002$ , respectively). Conversely, a T-cell  
263 depleted transplant was negatively associated with these monocyte subsets ( $p = 0.041$  and  $p = 0.008$ ,  
264 respectively) **Table 2**. Non-classical monocytes were not associated with any of the clinical predictors we  
265 defined.

266

267

268

269 **DISCUSSION**

270

271 HCT involves the administration of intense chemotherapy with or without radiation and  
272 antibiotic regimens, resulting in large shifts in leukocyte and microbiota compartments, often leading to  
273 complete compositional changes from one day to the next. The myeloablation associated with HCT  
274 provides a unique platform for exploring the nascent, re-development of immune reconstitution. Prior  
275 studies have supported the symbiotic relationship between the gut microbiota and the systemic  
276 immune system [59, 60], but most prior work has focused on the role the microbiota has on shaping  
277 different populations of T cells [30-32]; little is known about the impact intestinal commensalism has on  
278 monocyte maturation. We followed a systematic strategy to identify three subsets of monocytes  
279 (classical, intermediate, and non-classical monocytes) [10] during immune reconstitution post-HCT to  
280 assess whether constituents of the microbiota affect monocyte recovery.

281 This pilot study involved high-frequency collection of stool and blood samples from 18 patients  
282 to assess whether a link between the microbiota and monocyte recovery could be found. We found no  
283 correlation between the microbiota composition and differences in monocyte recovery when analyzing  
284 a higher-diversity microbiota or a microbiota composed primarily of either commensal anaerobes or  
285 Gram-negative organisms. We also found no association between microbiota composition and the  
286 expression of co-stimulatory markers, including CD86, HLA-DR and the chemokine receptor, CCR2.

287 Analysis of factors associated with immune reconstitution revealed that any link between the  
288 microbiota and immune reconstitution is weak relative to other clinical variables. As expected, GCSF  
289 exposure correlated positively with classical and intermediate monocyte reconstitution, while T cell  
290 depletion by means of CD34 positive selection was negatively associated with classical and intermediate  
291 monocyte subset reconstitution. We also found significant variability in the reconstitution of absolute

292 monocyte counts and monocyte subsets across patients. The biological significance that the varying rate  
293 of monocyte recovery has on patient outcomes needs to be further explored.

294         Discerning the effects of many patient variables in the setting of HCT, including medications  
295 delivered and clinical complications that ensue (bacteremia, fever, GVHD, etc.) make forming a direct  
296 relationship between the microbiota and monocytes in HCT patients challenging [61]. Medications given  
297 to HCT patients that have immunomodulating properties (i.e., antibiotics and steroids), could serve as  
298 confounders in our analysis. For example, 16/18 patients received ciprofloxacin and 7/18 patients  
299 received steroids. Ciprofloxacin can dampen the effects of LPS [62, 63], a potent stimulator of monocyte  
300 mobilization out of the bone marrow [30, 64], while steroids can reduce blood levels of monocytes [30,  
301 65]. Further, testing for intestinal LPS permeability in human serum or blood is technically challenging  
302 [61].

303         While we were not able to discern an association between microbiota composition and  
304 monocyte recovery in this heterogeneous pilot cohort, this study demonstrates the feasibility of high-  
305 resolution sampling of blood and stool samples and opens the door to future studies where sampling  
306 many more patients with daily frequency may help distinguish which microbial and clinical factors drive  
307 HCT patient outcomes.

308

309

310

311

312

313

314

315

316

317 **Figure Legends**

318 **Figure 1. Recovery of absolute monocyte counts (AMC) is variable among patients receiving different**  
319 **conditioning regimens and transplant types.** Graph showing absolute monocyte counts obtained for all  
320 patients when there was any sign of white blood cell recovery defined as “reconstitution day”  
321 (engraftment day – 2). Patient groups were divided by **(A)** conditioning, reduced intensity conditioning  
322 (RIC) and myeloablative conditioning (MAC) and **(B)** transplant type. Each color represents a different  
323 patient and a dashed line in each panel marks the upper limit of a “normal” AMC, defined by the MSKCC  
324 laboratory to be 1.3 K/mcL. In the upper righthand corner is the coefficient (i.e. slope/effect size)  
325 multiplied by 1.96 (+/- 95% confidence interval).

326

327 **Figure 2 Variable recoveries of monocyte populations (classical, intermediate, and non-classical).** **(A)**  
328 Time series for 3 representative patients using transplant day: Auto-HCT (top panel), Allo-HCT (reduced  
329 intensity conditioning (RIC; middle panel), and Allo-HCT myeloablative conditioning (MAC; bottom  
330 panel). The first figure (from left-to-right for each panel) is a cartoon illustration depicting each  
331 monocyte subtype, classical (C), intermediate (I), and non-classical (NC) (clockwise from left to right)  
332 that corresponds to successive multicolor flow cytometry plots that follow. The numbers in each gate  
333 are percentages of each monocyte population. The gating strategy is detailed in Supplementary Figure 1.  
334 **(B)** A boxplot showing the distribution of monocyte subsets determined from a patient’s last blood  
335 sample collected. Colored dashed lines indicate the upper limit of “normal” for the percent values for  
336 each monocyte subset: 85% classical monocytes (blue), 10% non-classical monocytes (yellow), 5%  
337 intermediate monocytes (green). Data points (dots) indicate the monocyte subset type using the same  
338 color scheme.

339

340 **Figure 3: Monocyte subset frequency does not correlate with microbiota diversity or proportion of**  
341 **obligate anaerobes. (A)** Relationship between the proportion of each monocyte subset and microbiota  
342 diversity measured by Inverse Simpson and **(B)** the proportion of obligate anaerobes (percent 16S rRNA  
343 gene sequences of *Negativacutes + Clostridia + Bacteroidiales + Fusobacteria*) in the stool microbiota for  
344 each matched stool and blood collection. Pearson correlation coefficient values are shown in the upper  
345 righthand corner of each panel.

346  
347 **Supplementary Figure 1: Circulating monocyte subsets in transplant patients following immune**  
348 **reconstitution.** Time series of blood samples collected for 15 representative patients with transplant day  
349 used to show when samples were collected: Auto-HCT patients (top panel), Allo-HCT patients (RIC  
350 (middle panel), and Allo-HCT patients (MAC) (bottom panel). A cartoon illustration in the upper  
351 righthand corner of each panel is again shown depicting the relative location of each monocyte subtype,  
352 classical (C), intermediate (I), and non-classical (NC) (clockwise from left to right).

353  
354 **Supplementary Figure 2: Monocyte gating strategy. (A)** Cells are first visualized on Live/Dead vs. FSC  
355 and a gate is drawn around the live cells. **(B)** A gate is drawn around lymphocytes and monocytes (SSC  
356 vs. FSC). **(C & D)** Doublets are then discriminated in two steps (FSC-A vs. FSC-W and SSC-A and SSC-W).  
357 **(E)** CD45+ (hematopoietic cells), lineage negative (Non-T, Non-B, Non-NK) cells were gated for. **(F)**  
358 Gating to further discriminate monocytes from granulocytes (CD15+, CD16+). **(G)**  
359 (CD14+CD16+) monocytes subsets (classical, intermediate, non-classical) are shown (plot f). Numbers  
360 are percentages of each population within each gate.

361  
362 **Supplementary Figure 3: Monocyte expression of immune activation markers does not correlate with**  
363 **microbiota diversity.** Relationship between compositional diversity of the gut microbiota, measured by

364 Inverse Simpson and the proportion of surface marker expression of each monocyte subsets (classical,  
365 intermediate, and nonclassical): CCR2 (top panel), CD86 (middle panel) and HLA-DR (bottom panel).  
366 Pearson correlation coefficient values are shown in the upper righthand corner of each panel.

367

368 **Supplementary Figure 4: Monocyte expression of immune activation markers does not correlate with**  
369 **proportion of obligate anaerobes in the microbiota.**

370 Relationship between the proportion of commensal anaerobes that make up the gut microbiota and the  
371 level of surface marker expression of each monocyte subsets (classical, intermediate, and nonclassical):  
372 CCR2 (top panel), CD86 (middle panel) and HLA-DR (bottom panel). Pearson correlation coefficient  
373 values are shown in the upper righthand corner of each panel.

374

375 **Table 1: Clinical characteristics of all 18 HCT patients including the number of blood samples and**  
376 **stools samples collected from each patient.** Abbreviations: Pt, patient; Auto, autologous; Allo,  
377 allogeneic; RIC, reduced intensity conditioning; MAC, myeloablative conditioning; DLBCL, diffuse large B  
378 cell lymphoma; MDS, myelodysplastic syndrome; CLL, chronic lymphocytic leukemia; ALL, acute  
379 lymphoblastic leukemia; AML, acute myeloid leukemia; cy, cyclophosphamide.

380

381 **Table 2: Parameters assessed for association with monocyte subset recovery**

382 Abbreviations: Auto, autologous; Allo, allogeneic; RIC, reduced intensity conditioning; MAC,  
383 myeloablative conditioning; GCSF, granulocyte colony-stimulating factor.

384

385 **Supplemental Table 1:**

386 Fluorochromes used to label antibodies used and their function

387



388 **Footnotes**

389 **Conflict of interest:** Dr. Perales reports honoraria from Abbvie, Bellicum, Bristol-Myers Squibb, Incyte,  
390 Merck, Novartis, Nektar Therapeutics, Omeros, and Takeda. He serves on DSMBs for Servier and  
391 Medigene, and the scientific advisory boards of MolMed and NexImmune. He has received research  
392 support for clinical trials from Incyte, Kite/Gilead and Miltenyi Biotec. He serves in a volunteer capacity  
393 as a member of the Board of Directors of American Society for Transplantation and Cellular Therapy  
394 (ASTCT) and Be The Match (National Marrow Donor Program, NMDP), as well as on the CIBMTR Cellular  
395 Immunotherapy Data Resource (CIDR) Committee. The other authors declare no conflict of interests.

396  
397 **Funding Statement:** This work was supported by the National Institutes of Health (grant R00-AI125786  
398 to M.C.A.; U01AI124275-03 to E.G. P; R01-CA228358 to M.v.d.B; P30 CA008748 MSKCC Support  
399 Grant/Core Grant, and Project 4 of P01-CA023766 to R. J. O'Reilly/M.v.d.B.). This work was further  
400 supported by the Parker Institute for Cancer Immunotherapy at Memorial Sloan Kettering Cancer  
401 Center. the Sawiris Foundation; the Society of Memorial Sloan Kettering Cancer Center; MSK Cancer  
402 Systems Immunology Pilot Grant, and Empire Clinical Research Investigator Program.

403  
404 **Meeting(s) where the information has previously been presented:** The information contained in this  
405 paper has not been presented at previous meetings

406  
407 **Funding:**  
408 This work was supported by the National Institutes of Health grant U01 AI124275 and grant R01  
409 AI137269 to EGP. Grant R00 AI125786 to MCA. This research was supported by the MSKCC Cancer  
410 Center Core Grant P30 CA008748.

411

412 **References:**

413

- 414 1. Sable, C.A. and G.R. Donowitz, *Infections in bone marrow transplant recipients*. Biol Blood  
415 Marrow Transplant  
416 , 1994. **18**(3): p. 273-81; quiz 282-4.
- 417 2. Maury, S., et al., *Prolonged immune deficiency following allogeneic stem cell transplantation:  
418 risk factors and complications in adult patients*. Br J Haematol, 2001. **115**(3): p. 630-41.
- 419 3. Small, T.N., et al., *Comparison of immune reconstitution after unrelated and related T-cell-  
420 depleted bone marrow transplantation: effect of patient age and donor leukocyte infusions*.  
421 Blood, 1999. **93**(2): p. 467-80.
- 422 4. Goldberg, J.D., et al., *Early recovery of T-cell function predicts improved survival after T-cell  
423 depleted allogeneic transplant*. Leuk Lymphoma, 2017. **58**(8): p. 1859-1871.
- 424 5. Taur, Y., et al., *The effects of intestinal tract bacterial diversity on mortality following allogeneic  
425 hematopoietic stem cell transplantation*. Blood, 2014. **124**(7): p. 1174-82.
- 426 6. Staffas, A., et al., *Nutritional Support from the Intestinal Microbiota Improves Hematopoietic  
427 Reconstitution after Bone Marrow Transplantation in Mice*. Cell Host Microbe, 2018. **23**(4): p.  
428 447-457 e4.
- 429 7. Landmann, R., et al., *Human monocyte CD14 is upregulated by lipopolysaccharide*. Infect Immun,  
430 1996. **64**(5): p. 1762-9.
- 431 8. Ziegler-Heitbrock, L., *Blood Monocytes and Their Subsets: Established Features and Open  
432 Questions*. Front Immunol, 2015. **6**: p. 423.
- 433 9. Wong, K.L., et al., *Gene expression profiling reveals the defining features of the classical,  
434 intermediate, and nonclassical human monocyte subsets*. Blood, 2011. **118**(5): p. e16-31.

- 435 10. Marimuthu, R., et al., *Characterization of Human Monocyte Subsets by Whole Blood Flow*  
436 *Cytometry Analysis*. J Vis Exp, 2018(140).
- 437 11. Ziegler-Heitbrock, L., et al., *Nomenclature of monocytes and dendritic cells in blood*. Blood, 2010.  
438 **116**(16): p. e74-80.
- 439 12. Saha, P. and F. Geissmann, *Toward a functional characterization of blood monocytes*. Immunol  
440 Cell Biol, 2011. **89**(1): p. 2-4.
- 441 13. Hristov, M. and C. Weber, *Differential role of monocyte subsets in atherosclerosis*. Thromb  
442 Haemost, 2011. **106**(5): p. 757-62.
- 443 14. Belge, K.U., et al., *The proinflammatory CD14+CD16+DR++ monocytes are a major source of TNF*.  
444 J Immunol, 2002. **168**(7): p. 3536-42.
- 445 15. Serbina, N.V., et al., *Distinct responses of human monocyte subsets to Aspergillus fumigatus*  
446 *conidia*. J Immunol, 2009. **183**(4): p. 2678-87.
- 447 16. Diamond, R.D., E. Huber, and C.C. Haudenschild, *Mechanisms of destruction of Aspergillus*  
448 *fumigatus hyphae mediated by human monocytes*. J Infect Dis, 1983. **147**(3): p. 474-83.
- 449 17. Serbina, N.V., C. Shi, and E.G. Pamer, *Monocyte-mediated immune defense against murine*  
450 *Listeria monocytogenes infection*. Adv Immunol, 2012. **113**: p. 119-34.
- 451 18. Smith, M.S., et al., *Human cytomegalovirus induces monocyte differentiation and migration as a*  
452 *strategy for dissemination and persistence*. J Virol, 2004. **78**(9): p. 4444-53.
- 453 19. Konuma, T., et al., *Circulating monocyte subsets in human chronic graft-versus-host disease*.  
454 Bone Marrow Transplant, 2018.
- 455 20. Konuma, T., et al., *Circulating monocyte subsets in human chronic graft-versus-host disease*.  
456 Bone Marrow Transplant, 2018. **53**(12): p. 1532-1540.

- 457 21. Chan, G., M.T. Nogalski, and A.D. Yurochko, *Human cytomegalovirus stimulates monocyte-to-*  
458 *macrophage differentiation via the temporal regulation of caspase 3.* J Virol, 2012. **86**(19): p.  
459 10714-23.
- 460 22. Rommeley, M., et al., *Reconstitution and functional analyses of neutrophils and distinct subsets*  
461 *of monocytes after allogeneic stem cell transplantation.* J Cancer Res Clin Oncol, 2011. **137**(9): p.  
462 1293-300.
- 463 23. Thoma, M.D., et al., *Peripheral blood lymphocyte and monocyte recovery and survival in acute*  
464 *leukemia postmyeloablative allogeneic hematopoietic stem cell transplant.* Biol Blood Marrow  
465 Transplant, 2012. **18**(4): p. 600-7.
- 466 24. DeCook, L.J., et al., *Impact of lymphocyte and monocyte recovery on the outcomes of allogeneic*  
467 *hematopoietic SCT with fludarabine and melphalan conditioning.* Bone Marrow Transplant,  
468 2013. **48**(5): p. 708-14.
- 469 25. Chung, H., et al., *Gut immune maturation depends on colonization with a host-specific*  
470 *microbiota.* Cell, 2012. **149**(7): p. 1578-93.
- 471 26. Smith, K., K.D. McCoy, and A.J. Macpherson, *Use of axenic animals in studying the adaptation of*  
472 *mammals to their commensal intestinal microbiota.* Semin Immunol, 2007. **19**(2): p. 59-69.
- 473 27. Belkaid, Y. and T.W. Hand, *Role of the microbiota in immunity and inflammation.* Cell, 2014.  
474 **157**(1): p. 121-41.
- 475 28. Abt, M.C., et al., *Commensal bacteria calibrate the activation threshold of innate antiviral*  
476 *immunity.* Immunity, 2012. **37**(1): p. 158-70.
- 477 29. Maynard, C.L., et al., *Reciprocal interactions of the intestinal microbiota and immune system.*  
478 Nature, 2012. **489**(7415): p. 231-41.
- 479 30. Shi, C., et al., *Bone marrow mesenchymal stem and progenitor cells induce monocyte emigration*  
480 *in response to circulating toll-like receptor ligands.* Immunity, 2011. **34**(4): p. 590-601.

- 481 31. Brenchley, J.M., et al., *Microbial translocation is a cause of systemic immune activation in*  
482 *chronic HIV infection*. Nat Med, 2006. **12**(12): p. 1365-71.
- 483 32. Di Lorenzo, F., et al., *Lipopolysaccharide structures of Gram-negative populations in the gut*  
484 *microbiota and effects on host interactions*. FEMS Microbiol Rev, 2019. **43**(3): p. 257-272.
- 485 33. Munford, R.S., *Sensing gram-negative bacterial lipopolysaccharides: a human disease*  
486 *determinant?* Infect Immun, 2008. **76**(2): p. 454-65.
- 487 34. Wang, X. and P.J. Quinn, *Endotoxins: lipopolysaccharides of gram-negative bacteria*. Subcell  
488 Biochem, 2010. **53**: p. 3-25.
- 489 35. Littman, D.R. and E.G. Pamer, *Role of the commensal microbiota in normal and pathogenic host*  
490 *immune responses*. Cell Host Microbe, 2011. **10**(4): p. 311-23.
- 491 36. Taur, Y., et al., *Intestinal domination and the risk of bacteremia in patients undergoing*  
492 *allogeneic hematopoietic stem cell transplantation*. Clin Infect Dis, 2012. **55**(7): p. 905-14.
- 493 37. Gabrilove, J.L., et al., *Effect of granulocyte colony-stimulating factor on neutropenia and*  
494 *associated morbidity due to chemotherapy for transitional-cell carcinoma of the urothelium*. N  
495 Engl J Med, 1988. **318**(22): p. 1414-22.
- 496 38. Chen, K., et al., *Broad range DNA probes for detecting and amplifying eubacterial nucleic acids*.  
497 FEMS Microbiol Lett, 1989. **48**(1): p. 19-24.
- 498 39. Caporaso, J.G., et al., *Ultra-high-throughput microbial community analysis on the Illumina HiSeq*  
499 *and MiSeq platforms*. ISME J, 2012. **6**(8): p. 1621-4.
- 500 40. Altschul, S.F., et al., *Basic local alignment search tool*. J Mol Biol, 1990. **215**(3): p. 403-10.
- 501 41. Tatusova, T., et al., *RefSeq microbial genomes database: new representation and annotation*  
502 *strategy*. Nucleic Acids Res, 2015. **43**(7): p. 3872.
- 503 42. A.E., M., *Measuring biological diversity*. . 2004, Malden, Ma: Blackwell Pub.

- 504 43. Becattini, S., Y. Taur, and E.G. Pamer, *Antibiotic-Induced Changes in the Intestinal Microbiota*  
505 *and Disease*. Trends Mol Med, 2016. **22**(6): p. 458-478.
- 506 44. Khosravi, A., et al., *Gut microbiota promote hematopoiesis to control bacterial infection*. Cell  
507 Host Microbe, 2014. **15**(3): p. 374-81.
- 508 45. Lee, Y.J., et al., *Protective Factors in the Intestinal Microbiome Against Clostridium difficile*  
509 *Infection in Recipients of Allogeneic Hematopoietic Stem Cell Transplantation*. J Infect Dis, 2017.  
510 **215**(7): p. 1117-1123.
- 511 46. Jenq, R.R., et al., *Intestinal Blautia Is Associated with Reduced Death from Graft-versus-Host*  
512 *Disease*. Biol Blood Marrow Transplant, 2015. **21**(8): p. 1373-83.
- 513 47. Wright, D.G., A.I. Meierovics, and J.M. Foxley, *Assessing the delivery of neutrophils to tissues in*  
514 *neutropenia*. Blood, 1986. **67**(4): p. 1023-30.
- 515 48. Ali, M.Y., et al., *Reassessing the definition of myeloid engraftment after autotransplantation: it is*  
516 *not necessary to see  $0.5 \times 10^9/l$  neutrophils on 3 consecutive days to define myeloid recovery*.  
517 Bone Marrow Transplant, 2002. **30**(11): p. 749-52.
- 518 49. Passlick, B., D. Flieger, and H.W. Ziegler-Heitbrock, *Identification and characterization of a novel*  
519 *monocyte subpopulation in human peripheral blood*. Blood, 1989. **74**(7): p. 2527-34.
- 520 50. Ziegler-Heitbrock, L., *The CD14+ CD16+ blood monocytes: their role in infection and*  
521 *inflammation*. J Leukoc Biol, 2007. **81**(3): p. 584-92.
- 522 51. Mukherjee, R., et al., *Non-Classical monocytes display inflammatory features: Validation in*  
523 *Sepsis and Systemic Lupus Erythematosus*. Sci Rep, 2015. **5**: p. 13886.
- 524 52. Hochberg, Y.B.a.Y., *Controlling the false discovery rate: a practical and powerful approach to*  
525 *multiple testing*. Journal of the Royal Statistical Society. Series B 1995. **57**(1): p. 289-300.

- 526 53. Adeli, K., et al., *Complex biological profile of hematologic markers across pediatric, adult, and*  
527 *geriatric ages: establishment of robust pediatric and adult reference intervals on the basis of the*  
528 *Canadian Health Measures Survey*. Clin Chem, 2015. **61**(8): p. 1075-86.
- 529 54. Horowitz, G.L., *Defining, Establishing, and Verifying Reference Intervals in the Clinical*  
530 *Laboratory, 3rd Edition*. 3 ed. Vol. 28. 2010.
- 531 55. Laboratories, M.C. *Test id: Cbc*  
532 *cbc with differential, blood*. 2019; Available from: [https://www.mayocliniclabs.com/test-](https://www.mayocliniclabs.com/test-catalog/Clinical+and+Interpretive/9109)  
533 [catalog/Clinical+and+Interpretive/9109](https://www.mayocliniclabs.com/test-catalog/Clinical+and+Interpretive/9109).
- 534 56. Ziegler-Heitbrock, H.W., *Heterogeneity of human blood monocytes: the CD14+ CD16+*  
535 *subpopulation*. Immunol Today, 1996. **17**(9): p. 424-8.
- 536 57. Appleby, L.J., et al., *Sources of heterogeneity in human monocyte subsets*. Immunol Lett, 2013.  
537 **152**(1): p. 32-41.
- 538 58. Patel, A.A., et al., *The fate and lifespan of human monocyte subsets in steady state and systemic*  
539 *inflammation*. J Exp Med, 2017. **214**(7): p. 1913-1923.
- 540 59. Mazmanian, S.K., et al., *An immunomodulatory molecule of symbiotic bacteria directs*  
541 *maturation of the host immune system*. Cell, 2005. **122**(1): p. 107-18.
- 542 60. Gomez de Agüero, M., et al., *The maternal microbiota drives early postnatal innate immune*  
543 *development*. Science, 2016. **351**(6279): p. 1296-302.
- 544 61. Hurley, J.C., *Endotoxemia: methods of detection and clinical correlates*. Clin Microbiol Rev, 1995.  
545 **8**(2): p. 268-92.
- 546 62. Ziegler, S., et al., *Antibiotics modulate the stimulated cytokine response to endotoxin in a*  
547 *human ex vivo, in vitro model*. Acta Anaesthesiol Scand, 2006. **50**(9): p. 1103-10.

- 548 63. Purswani, M.U., et al., *Effect of ciprofloxacin on lethal and sublethal challenge with endotoxin*  
549 *and on early cytokine responses in a murine in vivo model*. J Antimicrob Chemother, 2002. **50**(1):  
550 p. 51-8.
- 551 64. Serbina, N.V. and E.G. Pamer, *Monocyte emigration from bone marrow during bacterial infection*  
552 *requires signals mediated by chemokine receptor CCR2*. Nat Immunol, 2006. **7**(3): p. 311-7.
- 553 65. Rinehart, J.J., et al., *Effects of corticosteroid therapy on human monocyte function*. N Engl J Med,  
554 1975. **292**(5): p. 236-41.  
555



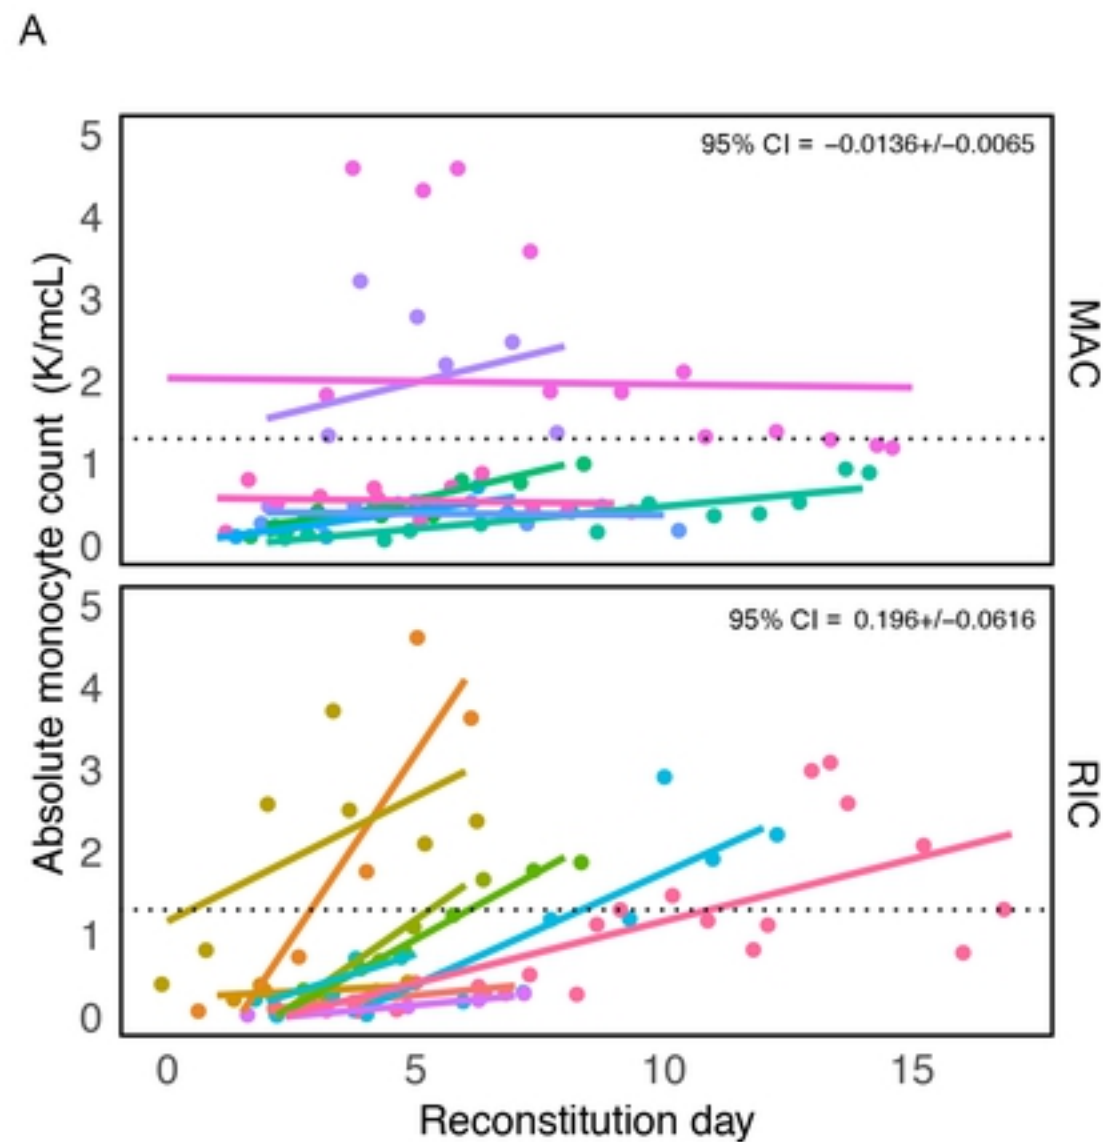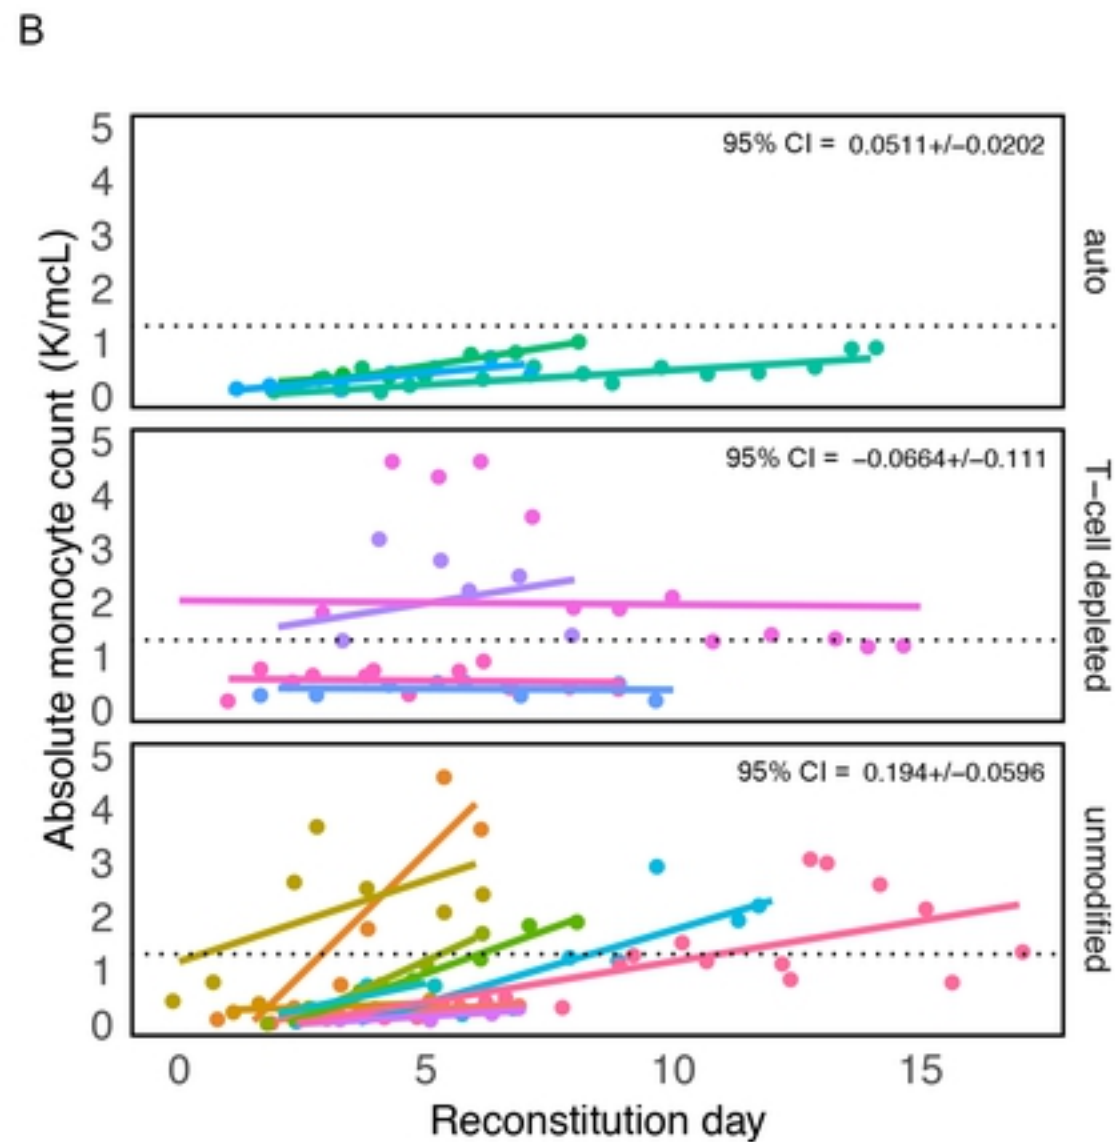

Fig 1

Figure 2A

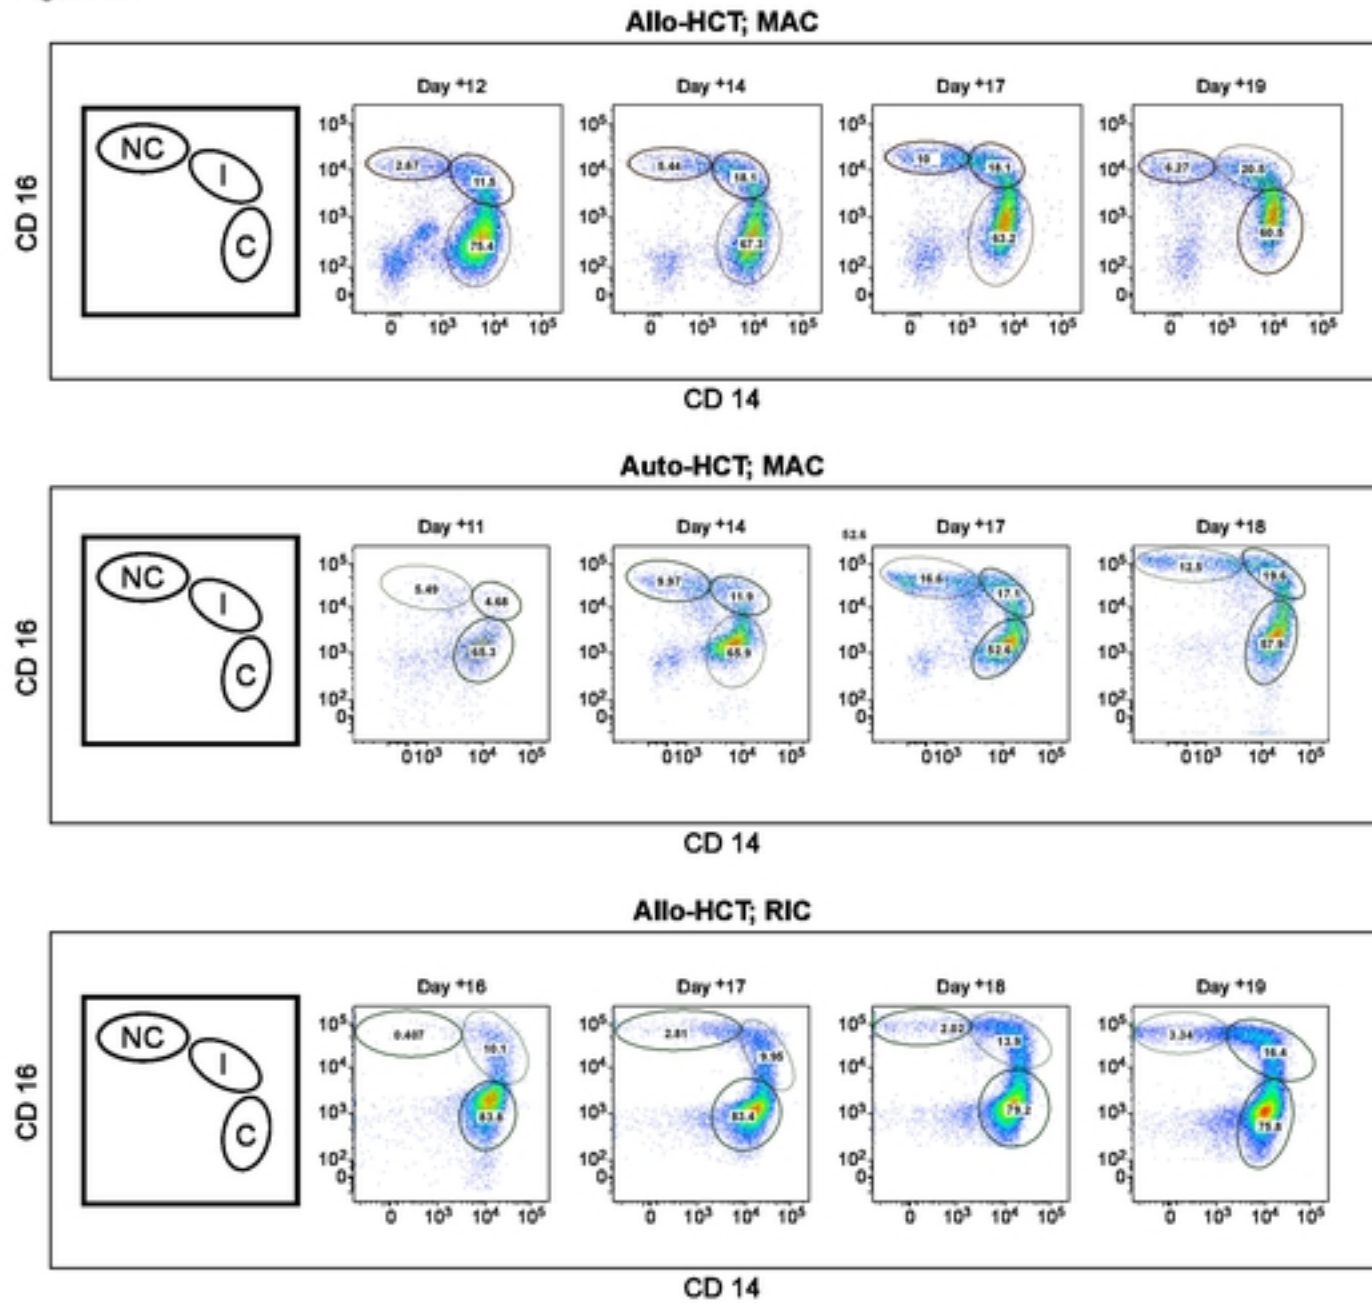

Figure 2B

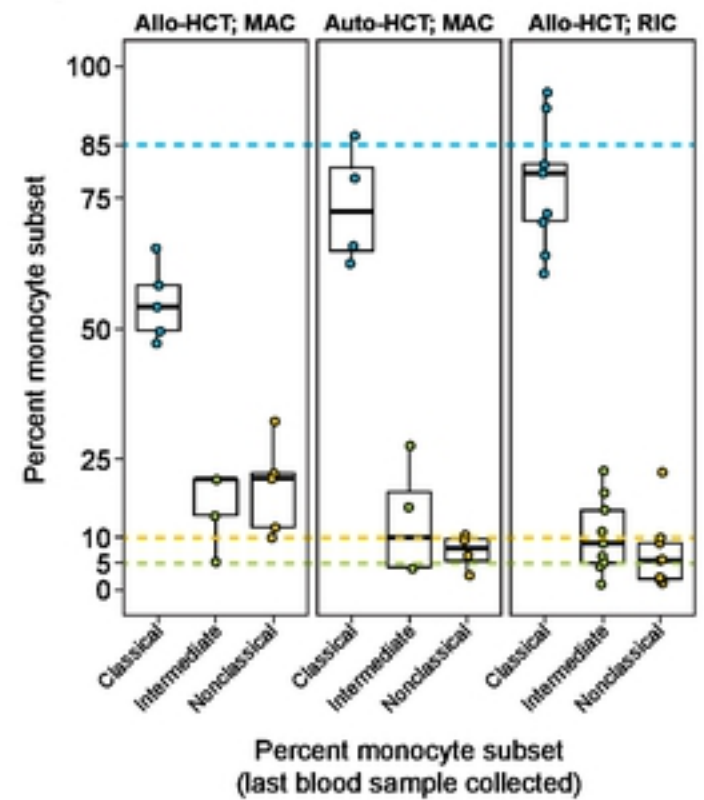

Fig 2

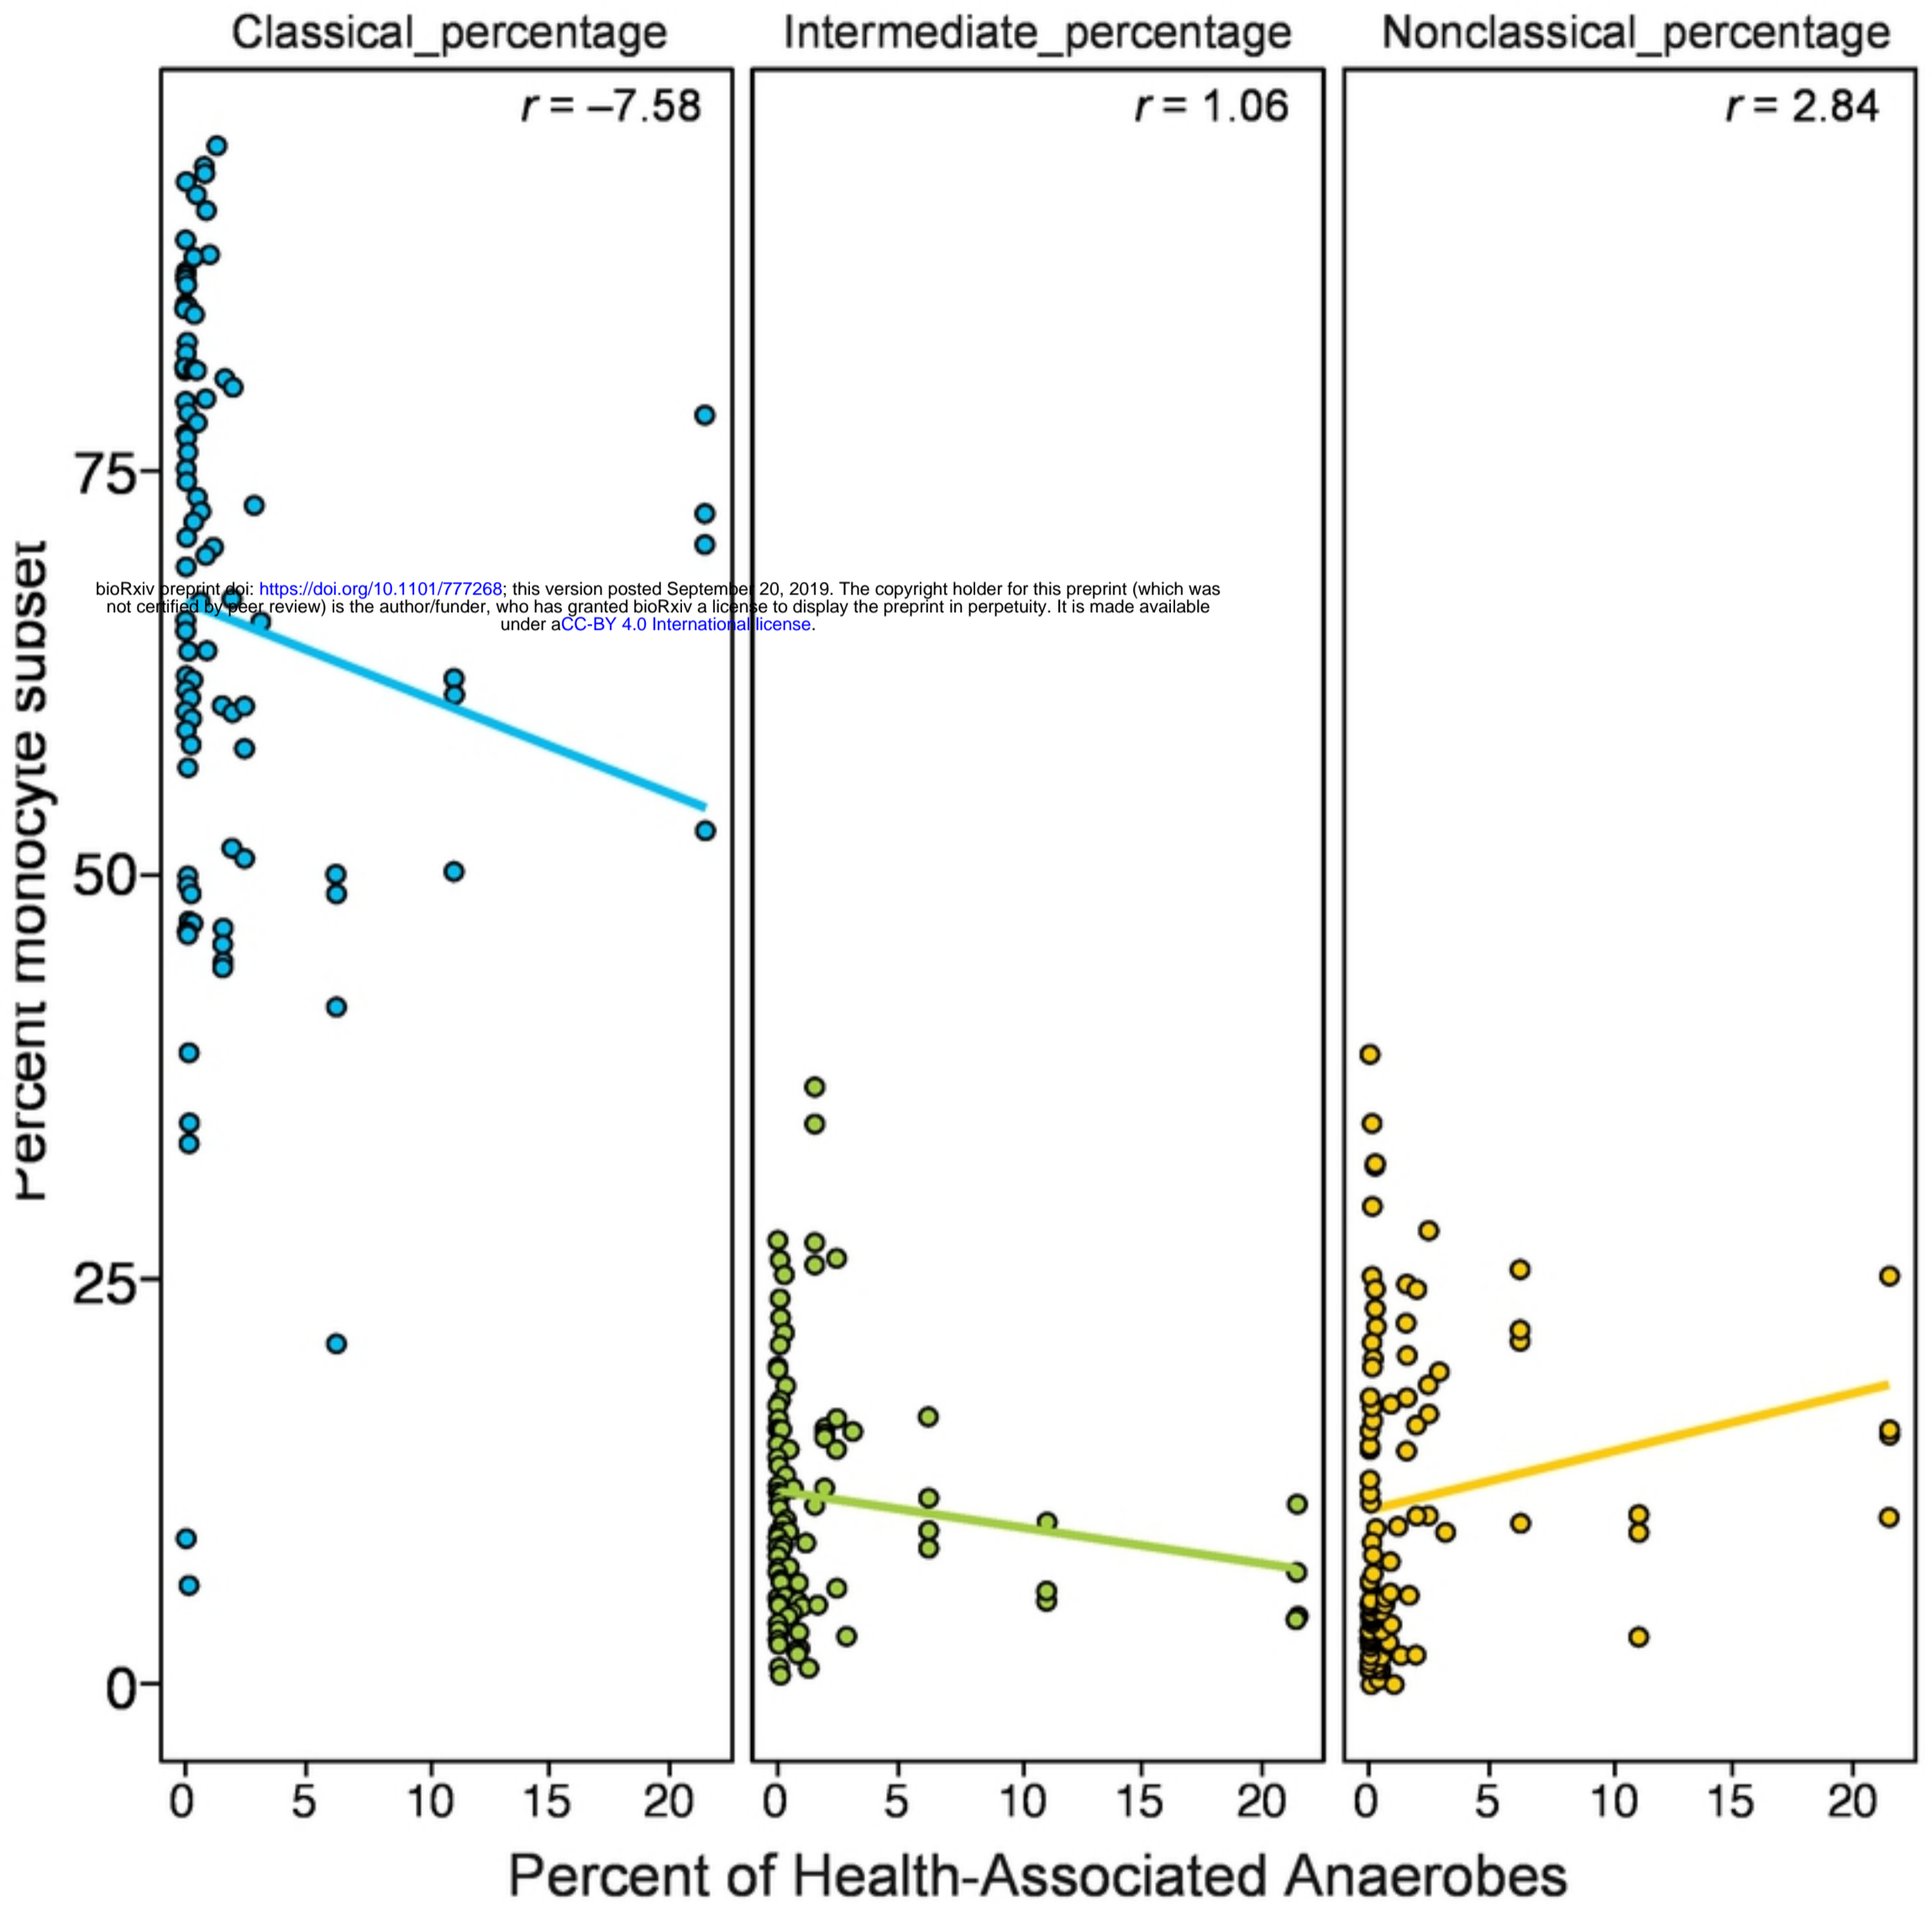

Fig 3
